# Supplementary material for: SARS-CoV-2 cases reported from long-term residential facilities (care homes) in South Africa: a retrospective cohort study
Source: Springer Nature journal article supplement (doi:10.1186/s12889-022-13403-6), 2022-05-24
Supplement: MOESM1 [file 22833448]

**Supplementary Table 1.** Number of residents and staff who tested positive for SARS-CoV-2 in 45 LTCFs across South Africa, 5 March 2020 – 12 March 2021, n=2,324

| Facility     | Resident |                 |            | Staff   |             |            |
|--------------|----------|-----------------|------------|---------|-------------|------------|
|              | Cases n  | Total residents | % infected | Cases n | Total staff | % infected |
| WCRV2        | 8        | 16              | 50.0       | 7       | 25          | 92.6       |
| ECRV4        | 4        | 45              | 8.8        | 11      | 36          | 30.6       |
| MPRV4        | 19       | 267             | 7.1        | 14      | 19          | 73.6       |
| NWOAH1       | 0        | 29              | 0          | 1       | 33          | 3.0        |
| KZNSPSYCH1   | 103      | 580             | 22.0       | 0       | 339         | 0          |
| MPRV2        | 1        | 24              | 4.2        | 0       | 0           | 0          |
| FSPSYCHMEN   | 155      | 685             | 22.6       | 165     | 903         | 18.3       |
| WCOAH1       | 34       | 157             | 21.7       | 55      | 250         | 22         |
| FSOAH1       | 2        | 50              | 4.0        | 0       | 31          | 0          |
| MPOAH        | 2        | 46              | 4.3        | 0       | 43          | 0          |
| MPRV3        | 23       | 67              | 34.3       | 0       | 63          | 0          |
| WCRV1        | 4        | 202             | 2.0        | 25      | 54          | 86.2       |
| GPRV         | 51       | 146             | 34.9       | 12      | 131         | 9.2        |
| ECRV1        | 22       | 215             | 10.2       | 35      | 184         | 19.0       |
| ECRV2        | 45       | 465             | 9.6        | 64      | 294         | 21.8       |
| ECPSYCH      | 71       | 648             | 10.9       | 44      | 224         | 19.6       |
| GPSARC3      | 39       | 350             | 11.1       | 26      | 155         | 16.7       |
| LPPSYCHMEN   | 35       | 160             | 21.9       | 34      | 154         | 22.1       |
| MPSARC       | 30       | 250             | 12.0       | 33      | 143         | 23.1       |
| GPSARC1      | 136      | 510             | 26.7       | 66      | 233         | 28.3       |
| ECRV3        | 35       | 120             | 29.2       | 23      | 100         | 23.0       |
| GPSARC2      | 36       | 220             | 16.3       | 25      | 106         | 23.6       |
| MPRV         | 2        | 57              | 3.6        | 0       | 20          | 0          |
| GPFCC        | 123      | 269             | 45.7       | 65      | 234         | 27.8       |
| FSOAH2       | 41       | 78              | 52.5       | 13      | 31          | 41.9       |
| MPOAH1       | 1        | 58              | 1.7        | 14      | 70          | 20         |
| MPFCC1       | 0        | 46              | 0          | 2       | 43          | 4.7        |
| MPOAH2       | 1        | 105             | 1          | 9       | 49          | 18.4       |
| WCOAH2       | 18       | 27              | 66.7       | 11      | 21          | 53.4       |
| MPOAH10      | 19       | 50              | 38         | 1       | 42          | 2.4        |
| KZNOAH1      | 37       | 609             | 6.0        | 30      | 43          | 69.8       |
| KZNOAH2      | 5        | 77              | 6.5        | 0       | 7           | 0          |
| KZNOAH4      | 11       | 70              | 15.7       | 1       | 51          | 2.0        |
| KZNOAH5      | 11       | 172             | 6.4        | 5       | 57          | 8.8        |
| KZNOAH6      | 6        | 217             | 2.8        | 0       | 11          | 0          |
| KZNOAH7      | 12       | 185             | 6.5        | 2       | 22          | 9.1        |
| KZNOAH8      | 42       | 140             | 30.0       | 5       | 152         | 3.2        |
| KZNSPSYCHMEN | 78       | 304             | 25.7       | 18      | 343         | 4.7        |

|             |      |      |      |     |      |      |
|-------------|------|------|------|-----|------|------|
| MPOAH9      | 0    | 36   | 0    | 1   | 32   | 3.1  |
| NWPSYCHMEN  | 213  | 573  | 42.1 | 0   | 1059 | 0    |
| WCOAH3      | 1    | 80   | 1.3  | 0   | 48   | 2.1  |
| FSOAH3      | 2    | 86   | 2.3  | 0   | 30   | 0    |
| FSOAH4      | 20   | 118  | 16.9 | 0   | 34   | 41.2 |
| FSOAH5      | 5    | 17   | 29.4 | 1   | 14   | 7.1  |
| MPPSYCHMEN1 | 1    | 68   | 1.5  | 2   | 54   | 3.7  |
| Total       | 1504 | 8694 | 17.2 | 820 | 5987 | 13.7 |

**Multi-panel figures**

**Sporadic cases among long-term care facilities**

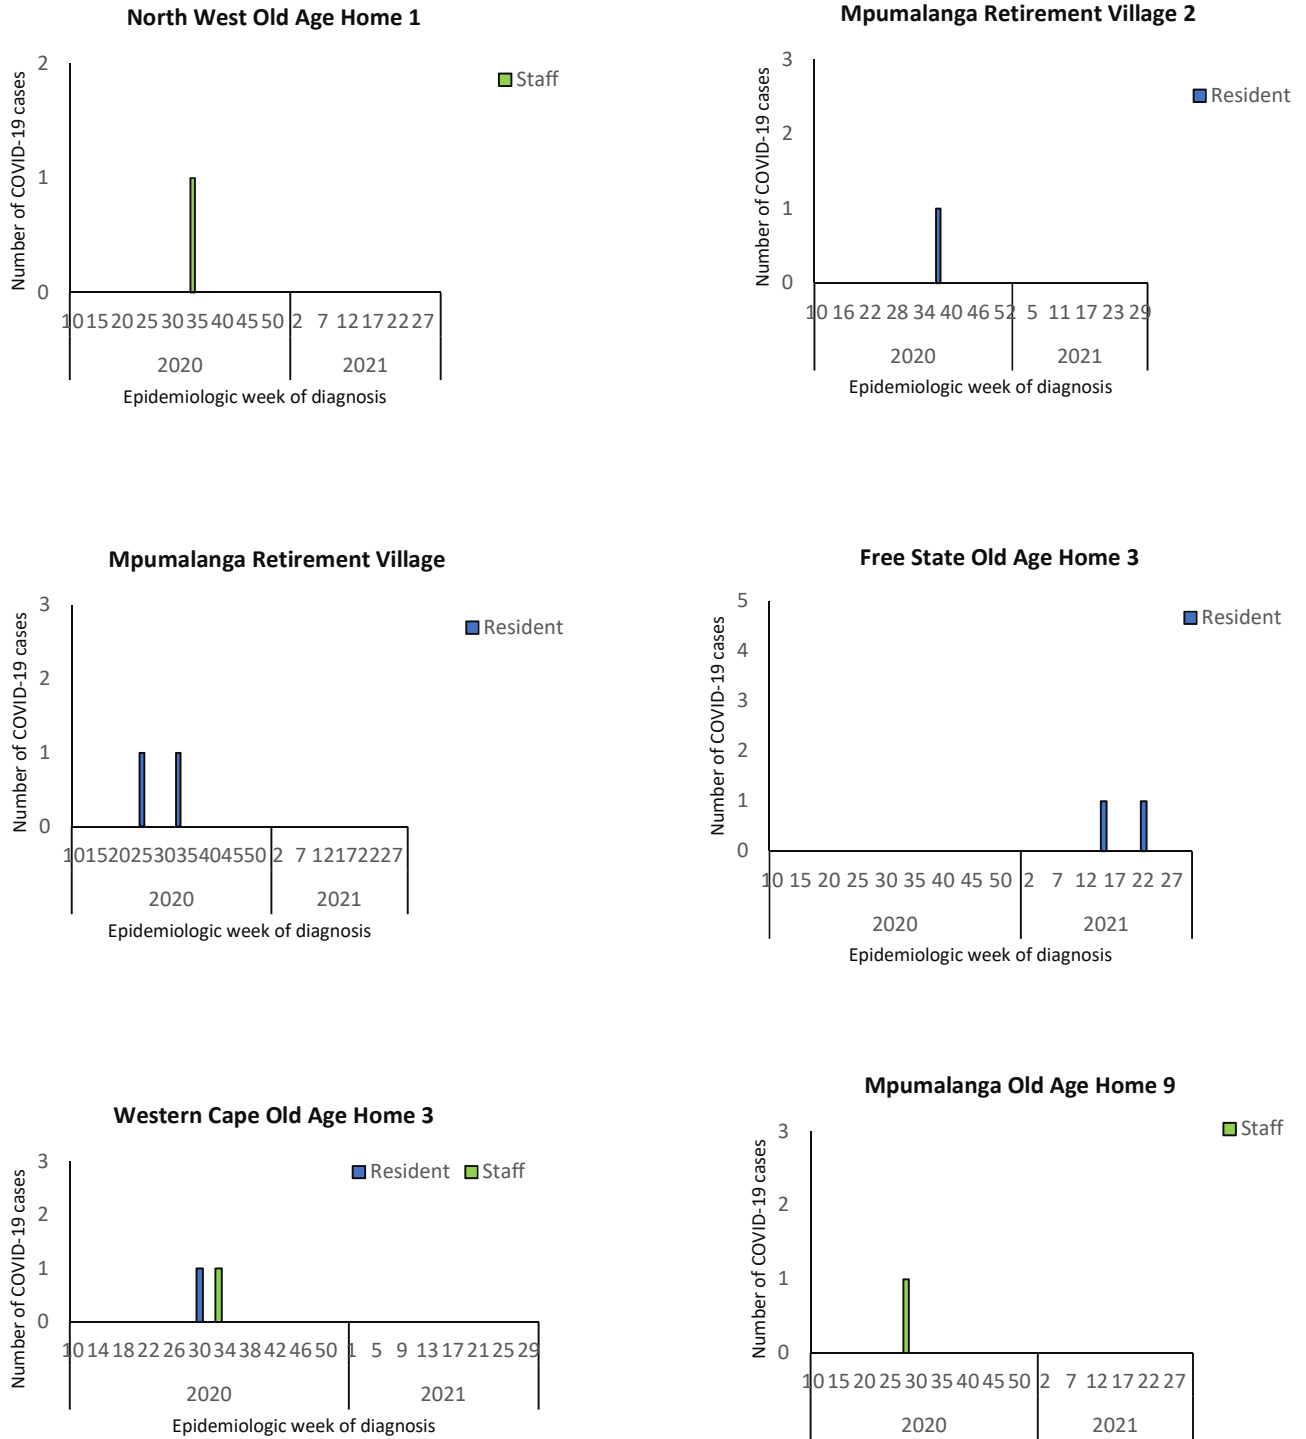

**Supplementary Figure a.** Number of SARS-CoV-2 cases among care homes reporting sporadic SARS-CoV-2 cases, South Africa, 5 March 2020 – 31 July 2021, n=6

## Small outbreaks among long term care facilities

### Mpumalanga Old Age Home 1

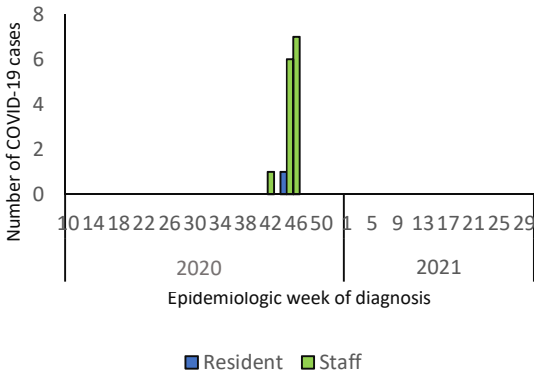

### KwaZulu-Natal Old Age Home 5

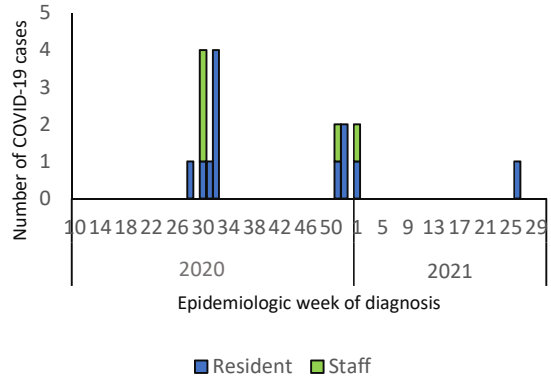

### KwaZulu-Natal Old Age Home 4

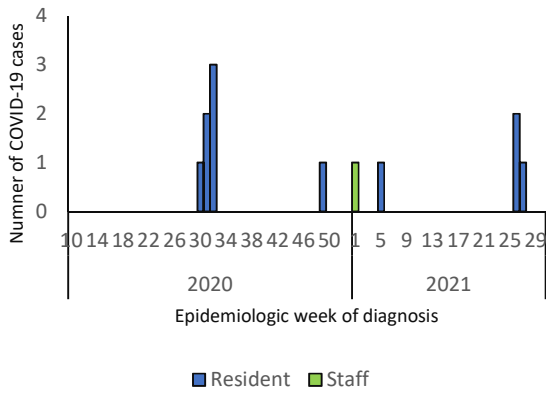

### Mpumalanga Old Age Home 2

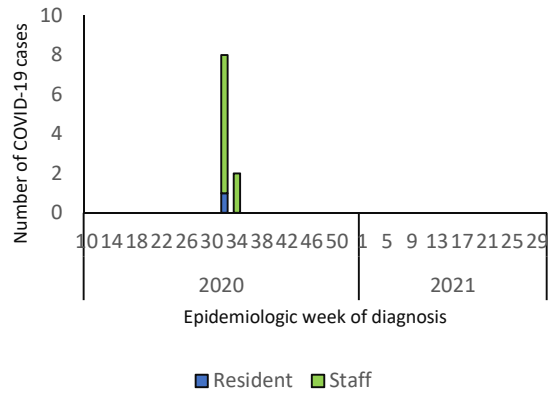

### Western Cape Retirement Village 2

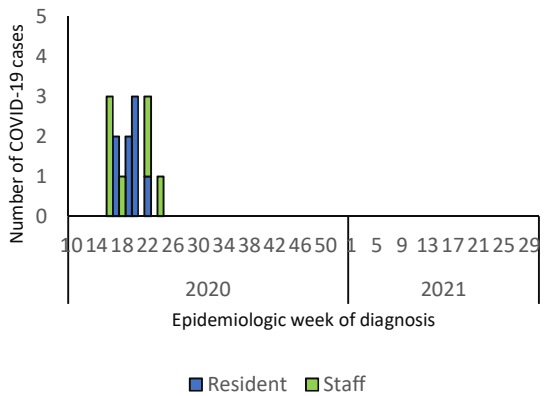

### KwaZulu-Natal Old Age Home 6

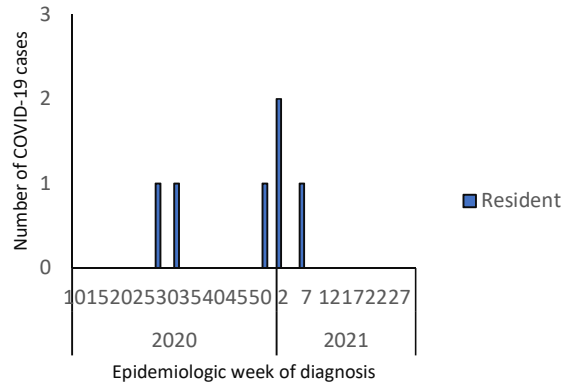

**Mpumalanga Frail Care Centre 1**

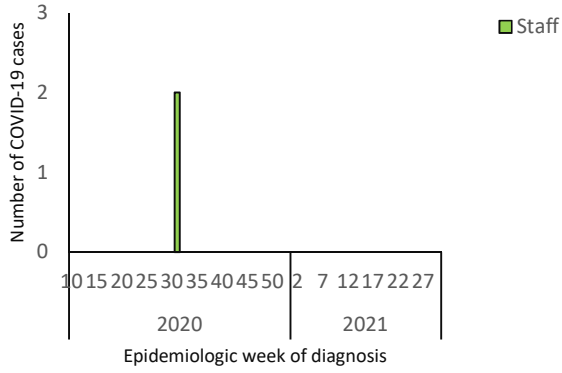

**KwaZulu-Natal Old Age Home 7**

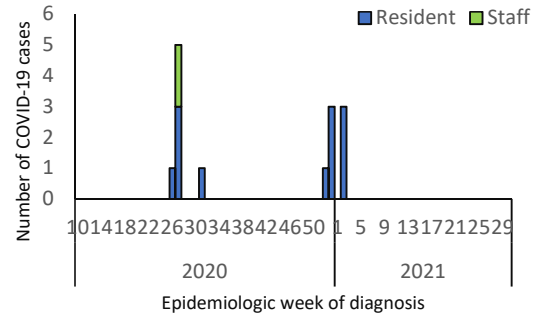

**Free State Old Age Home 4**

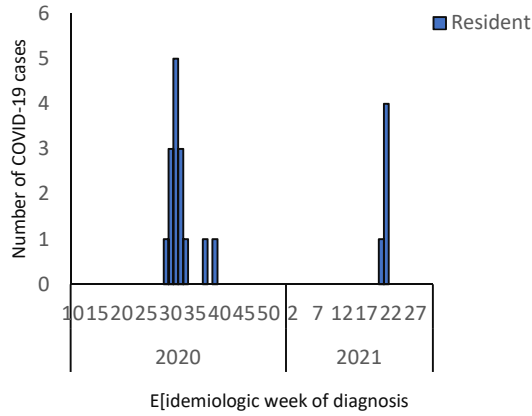

**KwaZulu-Natal Old Age Home 2**

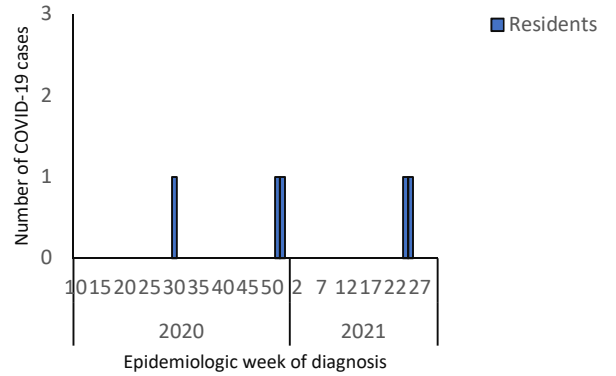

**Eastern Cape Retirement Village 4**

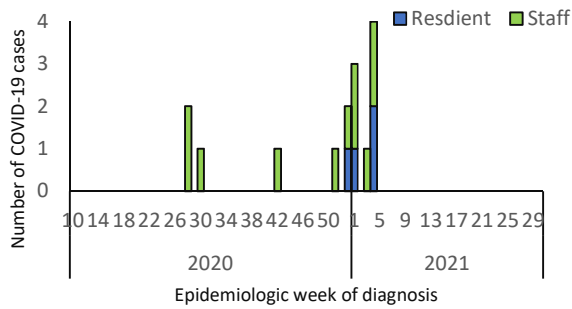

**Free State Old Age Home 5**

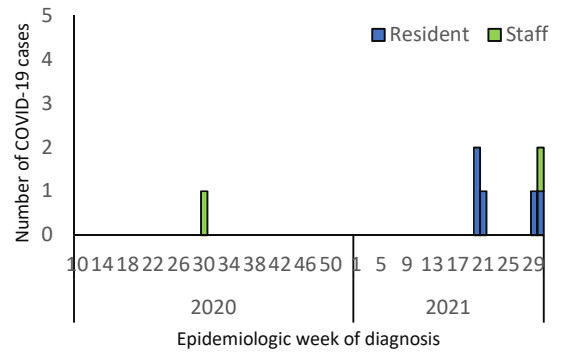

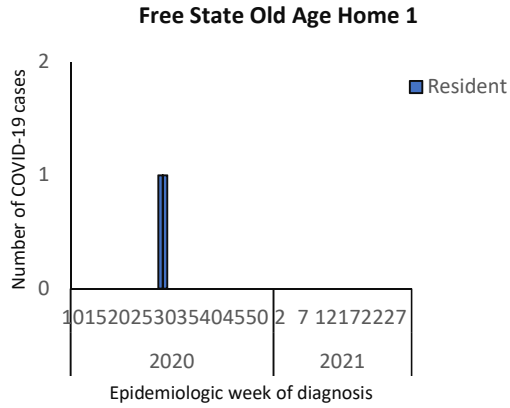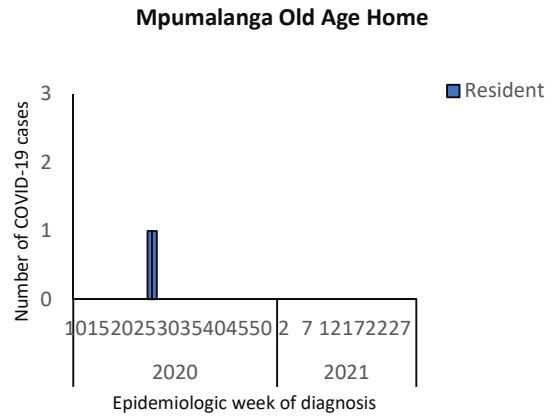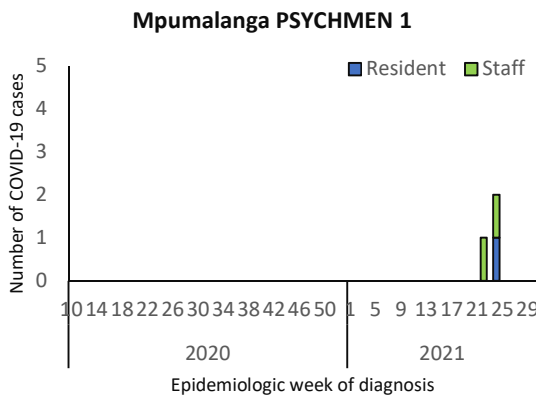

**Supplementary Figure b.** Number of SARS-CoV-2 cases among LTCFs reporting small outbreaks of SARS-CoV-2 cases, South Africa, 5 March 2020 – 31 July 2021, n=15



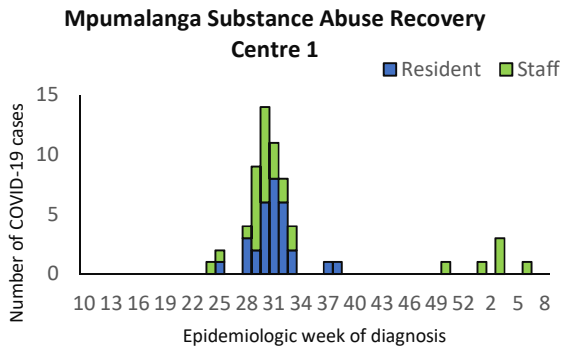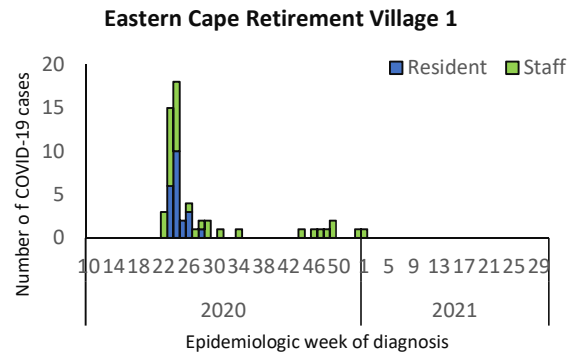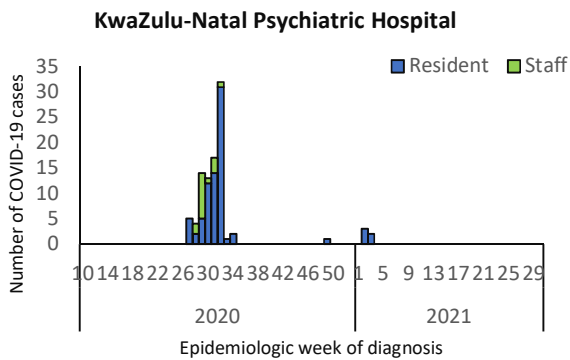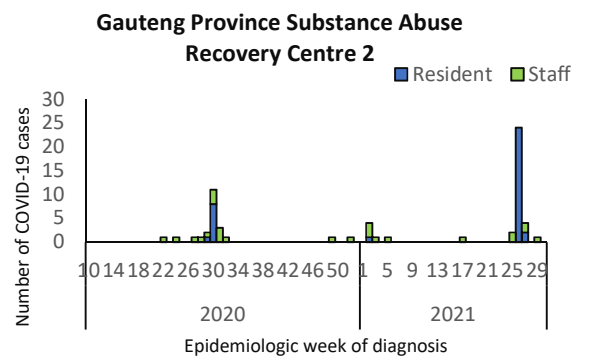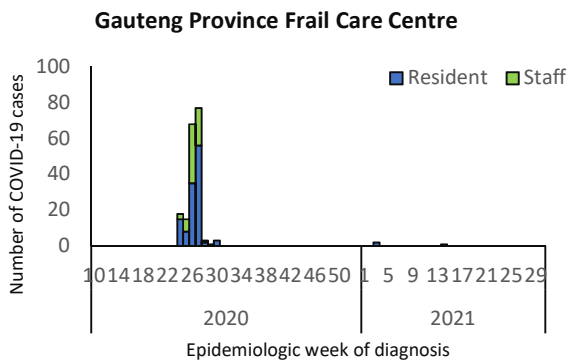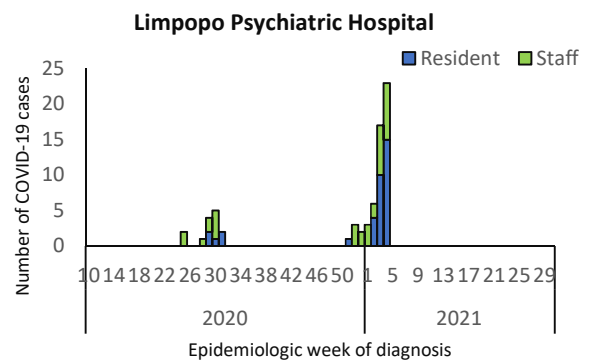



**Mpumalanga Retirement Village 3**

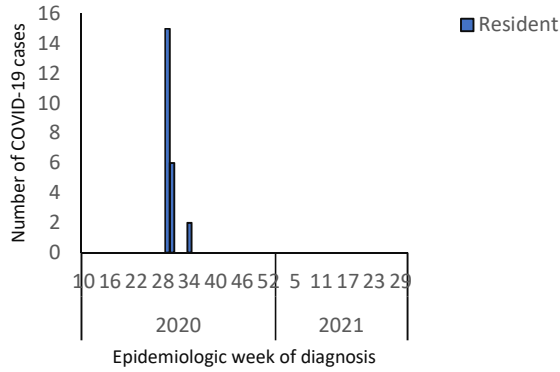

**Western Cape Retirement Village 1**

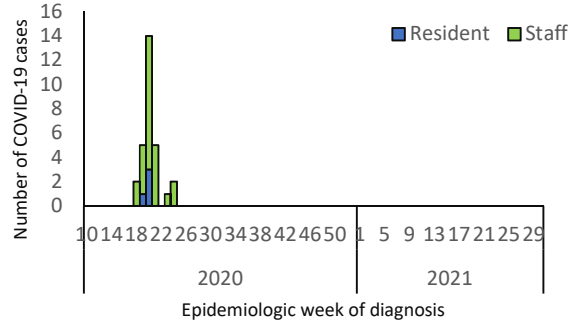

**Gauteng Province Retirement Village**

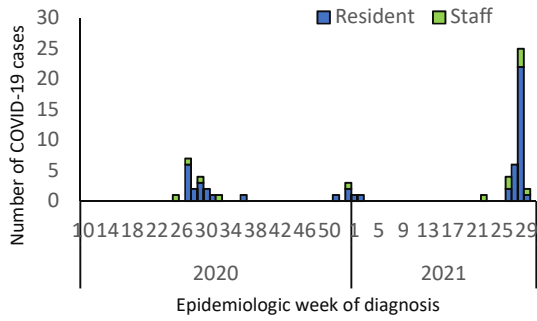

**Mpumalanga Retirement Village 4**

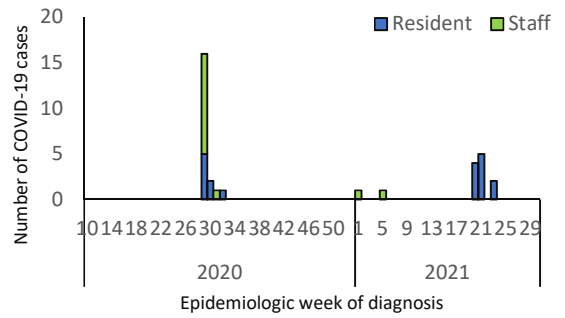

**KwaZulu-Natal Old Age Home 1**

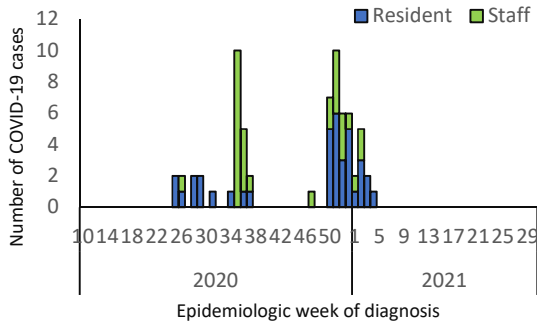

**Western Cape Old Age Home 2**

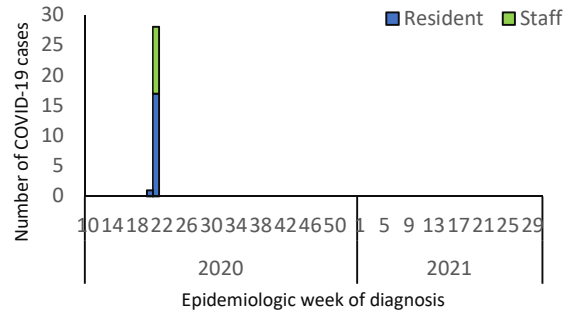

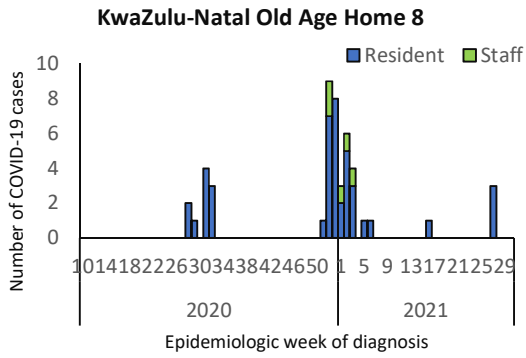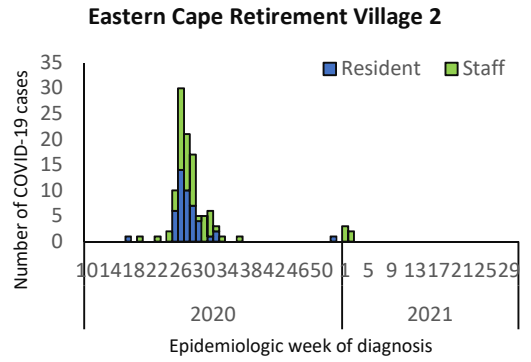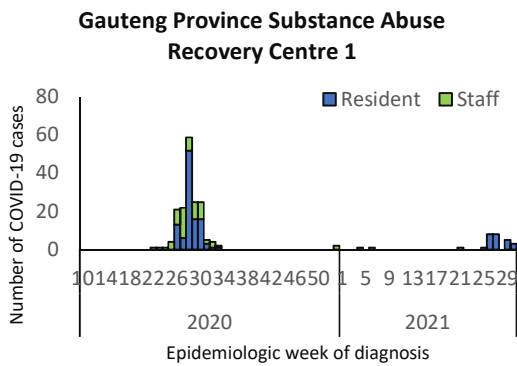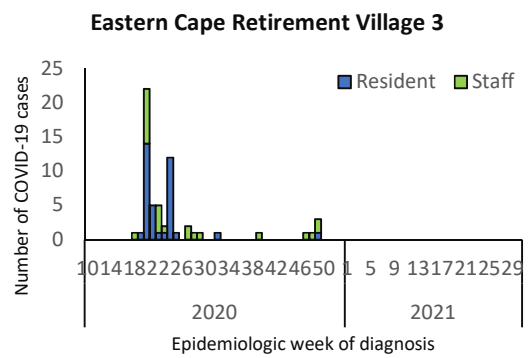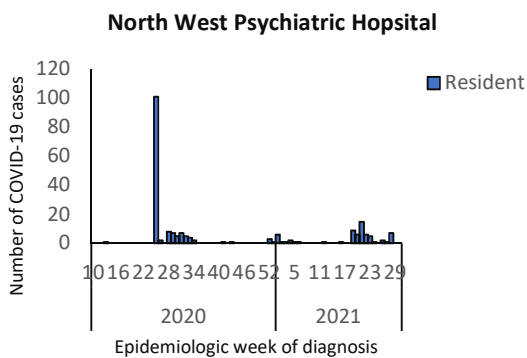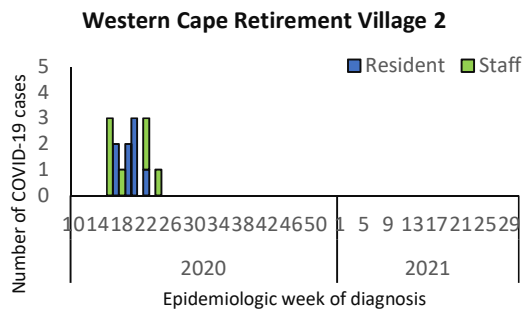

**Supplementary Figure c.** Number of SARS-CoV-2 cases among LTCFs reporting large outbreaks of SARS-CoV-2 cases, South Africa, 5 March 2020 – 31 July 2021, n=24
